# Supplementary material
Source: PubMed Central journal article supplement (PMC6036903)

**Supplemental Table.** Clinical, Operative, and Pathologic Characteristics Stratified by D0/D1 versus D2/D3 lymphadenectomy.

| Characteristic               | D0/D1           | D2/D3           | P     |
|------------------------------|-----------------|-----------------|-------|
| Age, y, median (IQR)         | 67.0(57.8-75.6) | 64.2(55.2-72.2) | 0.001 |
| Male sex                     | 150 (56.2)      | 252 (56.0)      | 0.96  |
| Race                         |                 |                 | 0.01  |
| White                        | 183 (68.5)      | 259 (57.6)      |       |
| African-American             | 37 (13.9)       | 92 (20.4)       |       |
| Asian                        | 31 (11.6)       | 53 (11.8)       |       |
| Others / Unknown             | 16 (6.0)        | 46 (10.2)       |       |
| ASA                          |                 |                 | 0.75  |
| 1-2                          | 92 (35.7)       | 151 (34.5)      |       |
| 3-4                          | 166 (64.3)      | 287 (65.5)      |       |
| Tumor size, cm, median (IQR) | 4.0 (2.2- 6.0)  | 4.0 (2.6- 6.8)  | 0.28  |
| Site                         |                 |                 | 0.45  |
| Antrum                       | 109 (42.2)      | 166 (37.3)      |       |
| Body                         | 86 (33.3)       | 164 (36.9)      |       |
| Cardia                       | 25 (9.7)        | 38 (8.5)        |       |
| Fundus                       | 17 (6.6)        | 43 (9.7)        |       |
| Gastroesophageal junction    | 21 (8.1)        | 34 (7.6)        |       |
| Lauren classification        |                 |                 | 0.28  |
| Diffuse                      | 43 (29.3)       | 107 (32.3)      |       |
| Intestinal                   | 102 (69.4)      | 212 (64.0)      |       |
| Mixed                        | 2 (1.4)         | 12 (3.6)        |       |
| Histologic Grade             |                 |                 | 0.07  |
| Well to Moderate             | 90 (34.9)       | 122 (28.2)      |       |
| Moderate to Poor             | 168 (65.1)      | 310 (71.8)      |       |
| Depth of Invasion            |                 |                 | 0.11  |
| T1                           | 72 (27.5)       | 101 (23.1)      |       |
| T2                           | 37 (14.1)       | 63 (14.4)       |       |
| T3                           | 93 (35.5)       | 138 (31.5)      |       |
| T4                           | 60 (22.9)       | 136 (31.1)      |       |
| AJCC Stage                   |                 |                 | 0.05  |
| I                            | 93 (35.4)       | 119 (26.9)      |       |
| II                           | 65 (24.7)       | 114 (25.7)      |       |
| III                          | 105 (39.9)      | 210 (47.4)      |       |
| Nodal Status                 |                 |                 | 0.25  |
| Negative                     | 116 (43.6)      | 176 (39.2)      |       |
| Positive                     | 150 (56.4)      | 273 (60.8)      |       |
| LNR, median (IQR)            | 0.1 (0.0- 0.4)  | 0.1 (0.0- 0.4)  | 0.85  |
| Margin                       |                 |                 | 0.01  |
| R0                           | 237 (89.1)      | 423 (94.4)      |       |
| R1                           | 29 (10.9)       | 25 (5.6)        |       |
| Operation Type               |                 |                 | 0.001 |
| Distal and wedge resection   | 68 (25.5)       | 63 (14.0)       |       |
| Subtotal                     | 96 (36.0)       | 196 (43.6)      |       |
| Total                        | 103 (38.6)      | 191 (42.4)      |       |

Supplemental Figure 1. Study Cohort

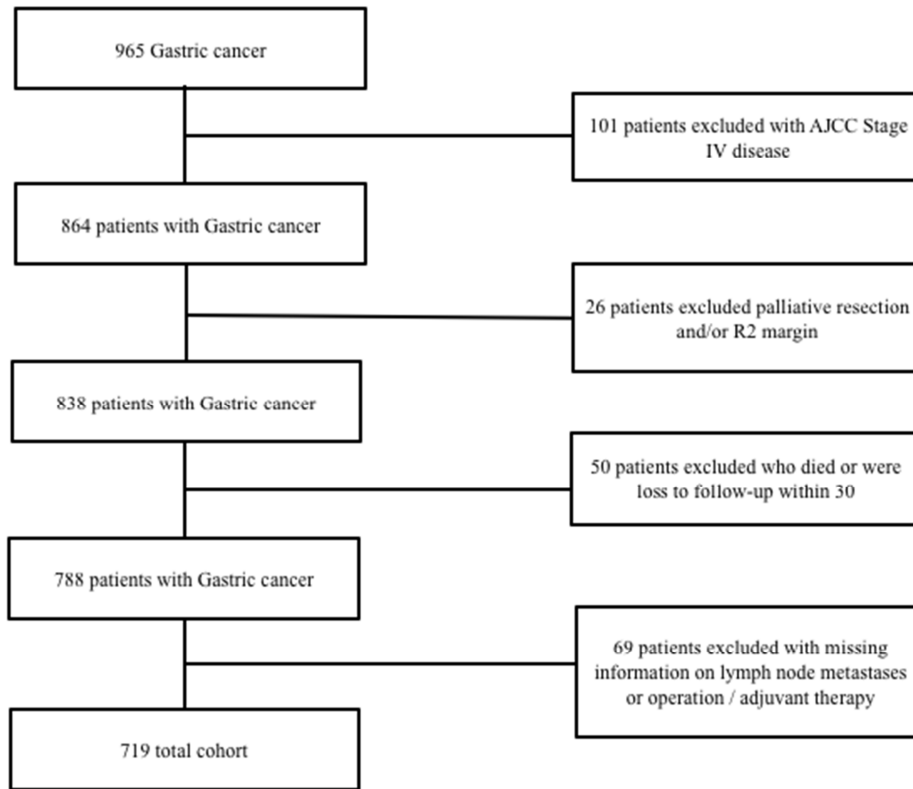

Supplemental Figure 2. Overall Survival Stratified by Lymph Node Ratio Categories

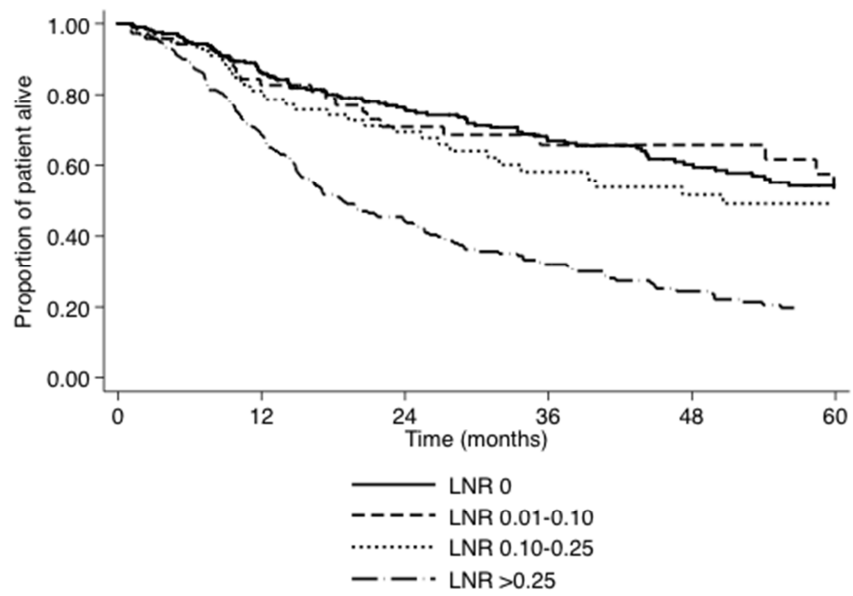

Supplement: NIHMS966328-supplement-01.pdf [file NIHMS966328-supplement-01.pdf]
